# Supplementary material for: A tetraspanin regulates septate junction formation in Drosophila midgut
Source: Oxford University Press journal article supplement (doi:10.1242/jcs.180448), 2016-02-05
Supplement: jcs180448supp.pdf [file jcs180448supp.pdf]

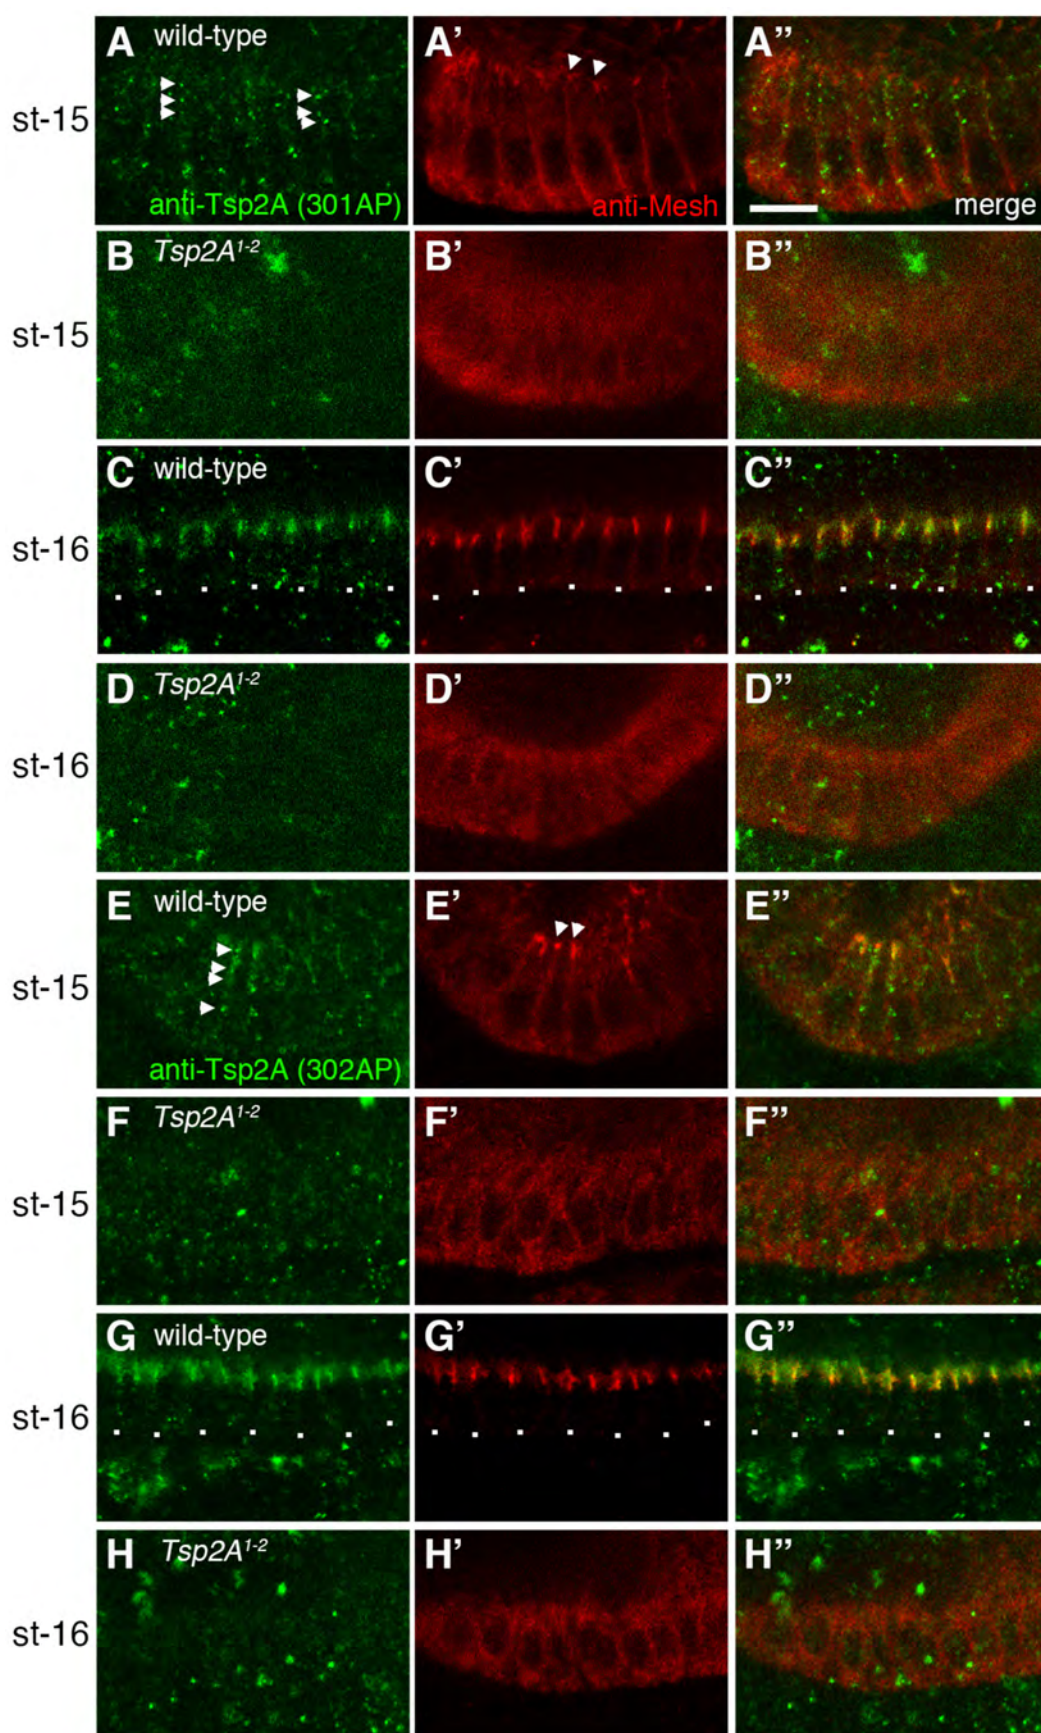

**Figure S1. Tsp2A and Mesh distribution during sSJ formation in wild-type and *Tsp2A*<sup>l-2</sup>-mutant embryos**

(A-H'') Double-staining of stage-15 wild-type embryos (A-A'' and E-E''), *Tsp2A*<sup>l-2</sup>-mutant embryos (B-B'' and F-F''), stage-16 wild-type embryos (C-C'' and G-G'') and *Tsp2A*<sup>l-2</sup>-mutant embryos (D-D'' and H-H'') with a combination of anti-Tsp2A antibody (301AP for A-D or 302AP for E-H) and anti-Mesh antibody (A'-H'). Arrowheads in A and E indicate the aggregates of Tsp2A along the lateral membrane. Arrowheads in A' and E' indicate the apicolateral accumulation of Mesh. Scale bar: 5 μm (A-H'').

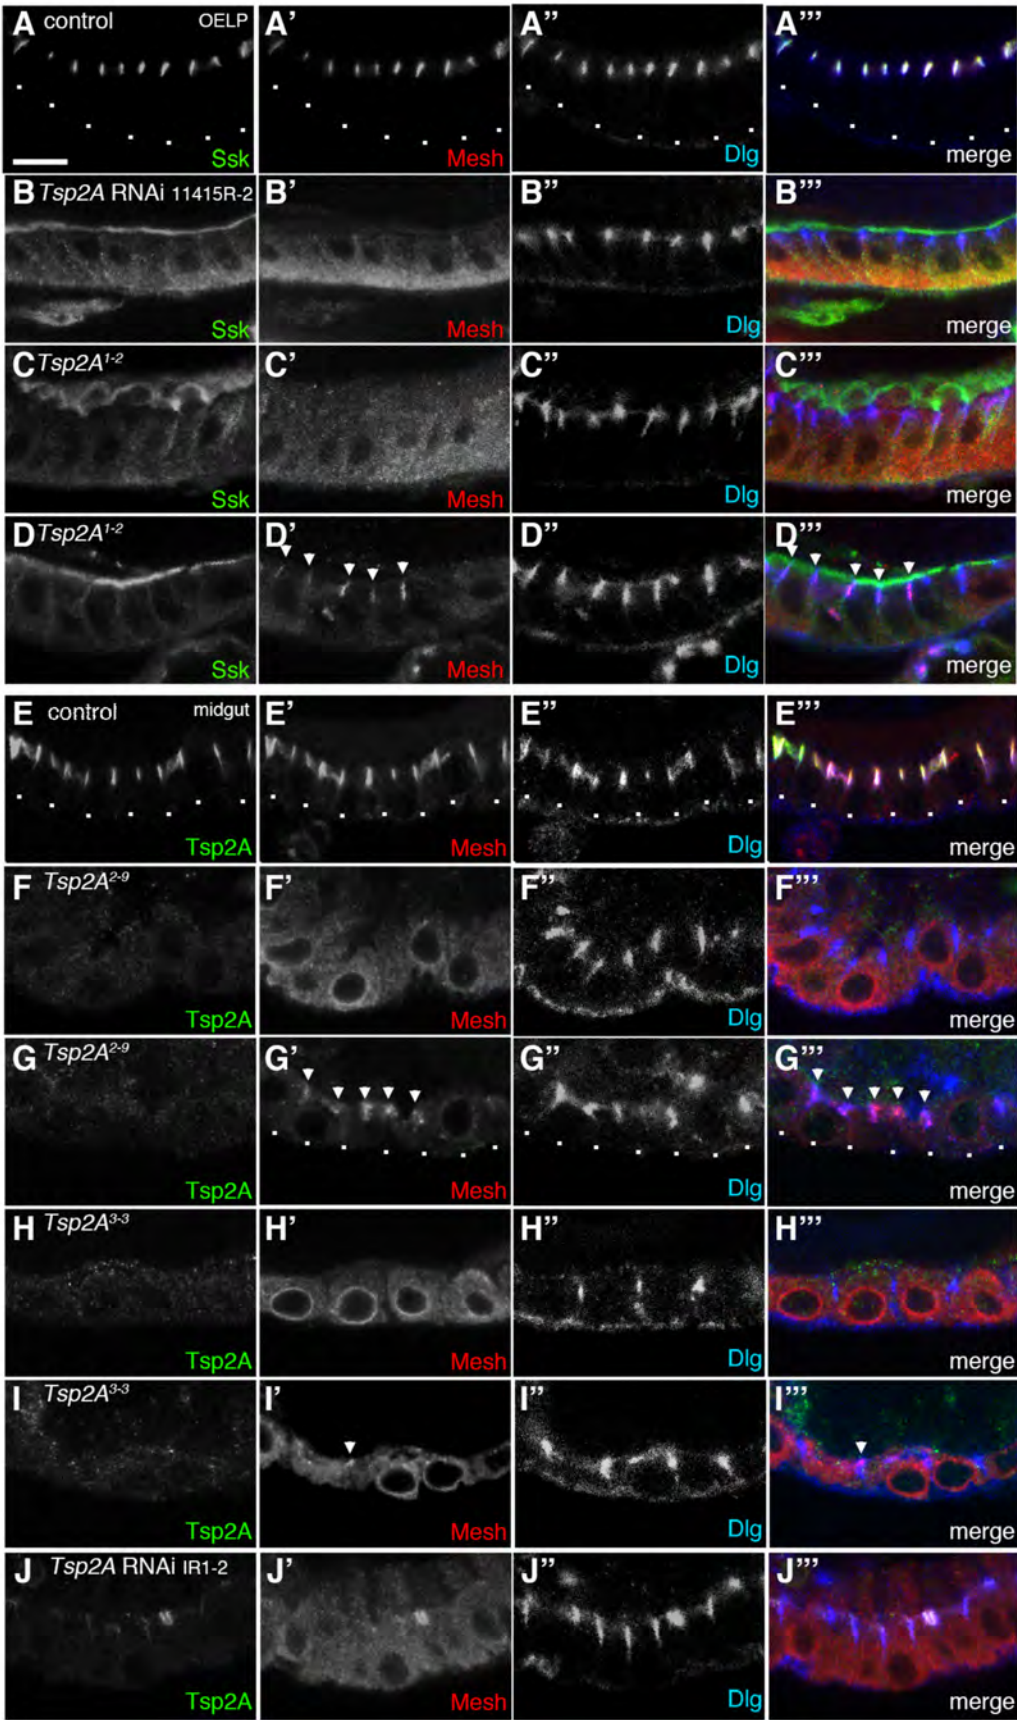



**Figure S2. sSJ components are mislocalized in *Tsp2A*-mutant epithelial cells.**

(A-D'') The first-instar larval OELP of control (A-A''), *Tsp2A*-RNAi 11415R-2 (B-B'') and *Tsp2A*<sup>l-2</sup>-mutant (C-C'' and D-D'') stained with anti-Ssk (A-D), anti-Mesh (A'-D') and anti-Dlg (A''-D'') antibodies. The merged images are shown in A'''-D''', where the staining of anti-Ssk, anti-Mesh, and anti-Dlg is shown by green, red and blue, respectively. Arrowheads in D' and D''' indicate the apicolateral localization of Mesh in *Tsp2A*<sup>l-2</sup>-mutant OELP.

(E-J'') The first-instar larval midgut of control (E-E''), *Tsp2A*<sup>2-9</sup> (F-F'' and G-G''), *Tsp2A*<sup>3-3</sup> (H-H'' and I-I'') mutants and *Tsp2A*-RNAi IR1-2 (J-J'') stained with anti-Tsp2A (E-I), anti-Mesh (E'-I') and anti-Dlg (E''-I'') antibodies. The merged images are shown in E'''-J'''. Arrowheads in G', G'', I' and I''' indicate the apicolateral localization of Mesh in *Tsp2A*<sup>l-2</sup>-mutant epithelial cells. Basal membranes are delineated by dots. Scale bar: 5 μm.

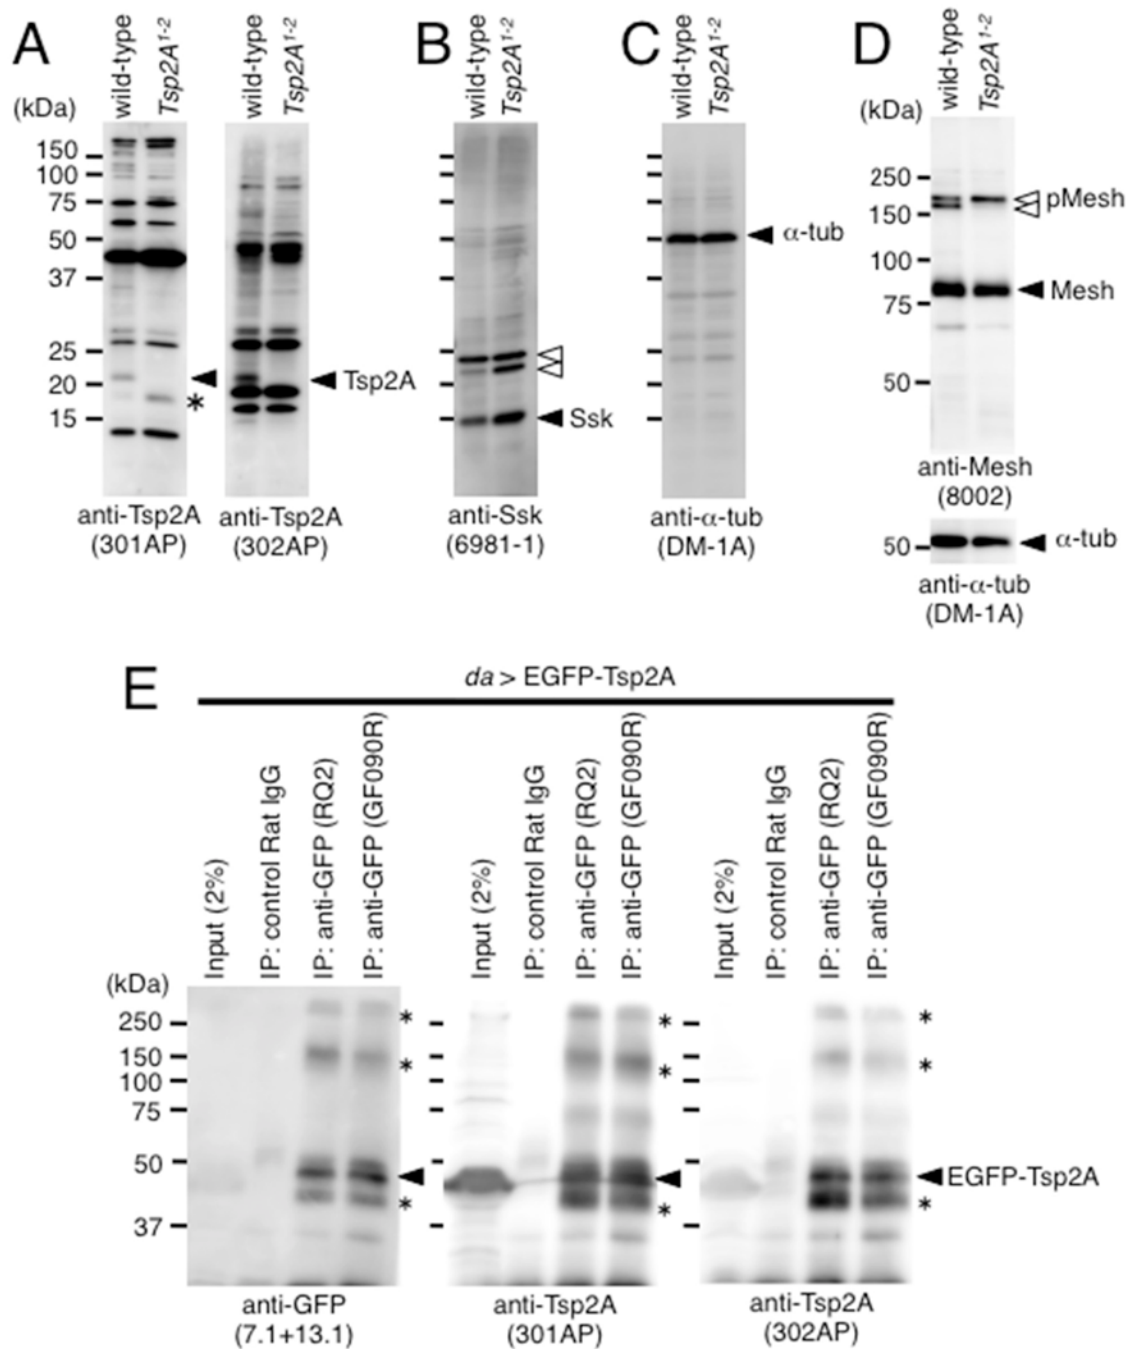

**Figure S3. Anti-Tsp2A antibodies recognize endogenous and exogenous Tsp2A in Western blots.**

(A-C) Extracts of the first-instar larva prepared from wild-type *Drosophila* and *Tsp2A<sup>1-2</sup>*-mutants were separated on a 15% SDS-polyacrylamide gel, and Western blot analyses were performed using anti-Tsp2A (A, left panel, 301AP; right panel, 302AP), anti-Ssk (B) and anti- $\alpha$ -tubulin (C) antibodies. A protein band of ~21 kDa was detected by anti-Tsp2A antibodies in the wild-type but not in the *Tsp2A<sup>1-2</sup>*-mutant (A; arrowheads), suggesting that the ~21 kDa band represents Tsp2A. Instead, an ~18 kDa band was detected by anti-Tsp2A antibody (301) in the *Tsp2A<sup>1-2</sup>*-mutant extract (A; asterisk of left panel). Protein bands other than the ~21 kDa band, detected by each

anti-Tsp2A antibody seem to originate from cross-reactions because they are observed in both of wild-type and *Tsp2A<sup>l-2</sup>*-mutant larvae (A). The density of the main band of Ssk (~15 kDa) is not significantly different in the *Tsp2A<sup>l-2</sup>*-mutant relative to the wild-type (B; arrowhead). White arrowheads in B indicate non-specific bands detected by anti-Ssk antibody. Western blots using anti- $\alpha$ -tubulin antibody show that the same quantities of protein were loaded in the wild-type and *Tsp2A<sup>l-2</sup>*-mutant extracts (C).

**(D)** Extracts of first-instar larvae prepared from wild-type *Drosophila* and the *Tsp2A<sup>l-2</sup>*-mutant were separated on an 8% SDS-polyacrylamide gel and Western blot analyses were performed using anti-Mesh (D; upper panel), and anti- $\alpha$ -tubulin (D; lower panel) antibodies. The density of the main band of Mesh is not significantly different in the *Tsp2A<sup>l-2</sup>*-mutant compared with the wild-type (D; arrowhead). However, the higher-molecular-mass band of Mesh is visible as a double band at ~200 kDa in the wild-type (upper and lower white arrowhead) but as a single band in the *Tsp2A<sup>l-2</sup>*-mutant (upper white arrowhead). Western blots using anti- $\alpha$ -tubulin antibody show that the same quantities of protein were loaded in the wild-type and *Tsp2A<sup>l-2</sup>*-mutant extracts (lower panel).

**(E)** The extracts of embryos expressing EGFP-Tsp2A with the *da*-GAL4 driver (Input) were subjected to immunoprecipitation (IP) with rat IgG and two kinds of anti-GFP antibodies (RQ2 or GF090R). The immunocomplexes were separated on a 12% SDS-polyacrylamide gel and Western blot analyses were performed using anti-GFP antibody (left panel) or anti-Tsp2A antibody (301AP; middle panel or 302AP; right panel). In addition to the main band of EGFP-Tsp2A (arrowhead), weak bands at 250, 150, and 40 kDa are detected by these antibodies (asterisks). In the input lanes, the specific bands of EGFP-Tsp2A were undetectable by these antibodies.

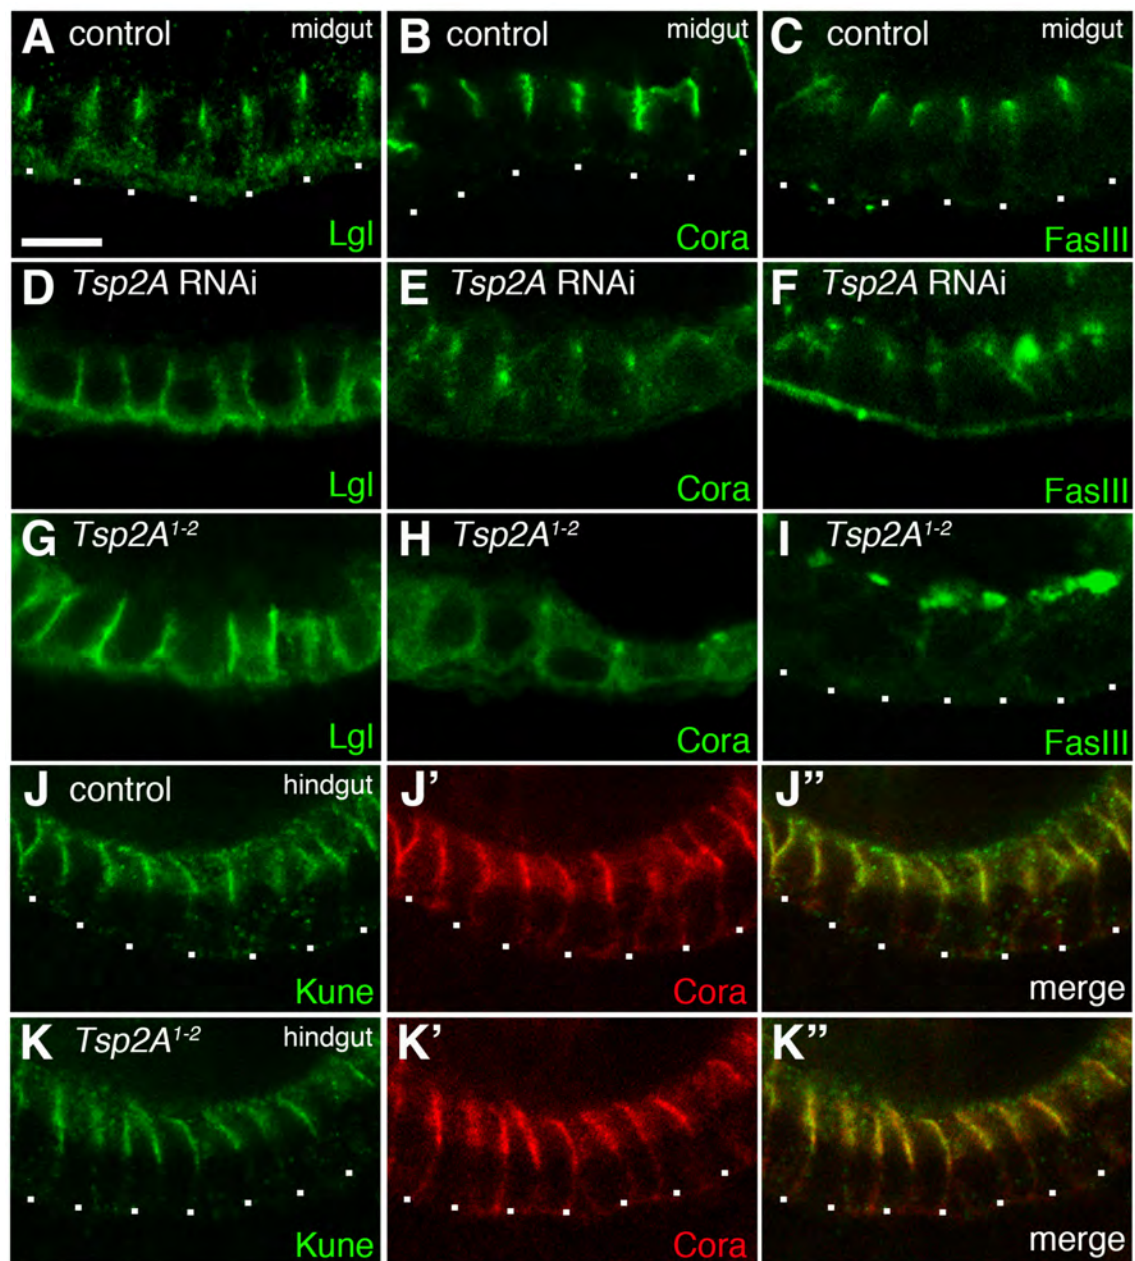

**Figure S4. A *Tsp2A* mutation causes mislocalization of SJ components in the midgut.**

(A-I) The first-instar larval OELP of control (A-C), *Tsp2A*-RNAi 11415R-2 (D-F) and *Tsp2A*<sup>1-2</sup>-mutant (G-I) stained with anti-Lgl (A, D and G), anti-Cora (B, E and H) and anti-FasIII (C, F and I) antibodies.

(J-K'') Antibody double-staining of stage-16 control (J-J'') and *Tsp2A*<sup>1-2</sup>-mutant (K-K'') embryos using anti-Kune (J and K) and anti-Cora (J' and K') antibodies. The merged images are shown in J'' and K''. Basal membranes are delineated by dots. Scale bar: 5 μm.
